# Supplementary material
Source: MDPI journal article supplement (https://www.mdpi.com/2073-4395/11/10/2009)
Supplement: s1 [file s1]

## Supplementary Information (SI)

**Table S1** Primer sequences of some key N cycling genes used for real time PCR

| Target gene     | Primer      | Primer sequence 5'-3' | Thermal profile                                                                                       | Reference |
|-----------------|-------------|-----------------------|-------------------------------------------------------------------------------------------------------|-----------|
| AOA <i>amoA</i> | Arch-amoAF  | STAATGGTCTGGCTTAGACG  | 94°C for 2 min followed by 40 cycles of 45 s at 94°C, 1 min at 53°C, 45 s at 68°C, plate read at 83°C | [1]       |
|                 | Arch-amoAR  | GCGGCCATCCATCTGTATGT  |                                                                                                       |           |
| AOB <i>amoA</i> | amoA-1F     | GGGGTTTCTACTGGTGGT    | 95°C for 5 min followed by 35 cycles of 45 s at 95°C, 45 s at 55°C and 1 min at 72°C                  | [1]       |
|                 | amoA-2R     | CCCCTCKGSAAAGCCTTCTTC |                                                                                                       |           |
| <i>nirS</i>     | nirS cd3a F | GTSAACGTSAAGGARACSGG  | 95°C for 2 min × 1 cycle; 95°C for 45 s, 55°C for 45 s, 72°C for 45 s, 85°C for 20 s × 40 cycles      | [2]       |
|                 | nirS R3cd R | GASTTCGGRTGSGTCTTGA   |                                                                                                       |           |
| <i>nirK</i>     | F1aCu       | ATCATGGTSCTGCCGCG     | 95°C for 3 min × 1 cycle; 95 °C for 30 s, 58 °C for 40 s, 72 °C for 40 s, 83 °C for 15 s × 40 cycles  | [3]       |
|                 | R3Cu        | GCCTCGATCAGRTTGTGGTT  |                                                                                                       |           |

### References

1. Shen, J.P.; Zhang, L.M.; Zhu, Y.G.; Zhang, J.B.; He, J.Z. Abundance and composition of ammonia-oxidizing bacteria and ammonia-oxidizing archaea communities of an alkaline sandy loam. *Environ. Microbiol.* **2008**, *10*, 1601-1611. <https://doi.org/10.1111/j.1462-2920.2008.01578.x>
2. Di, H.J.; Cameron, K.C.; Podolyan, A.; Robinson, A. Effect of soil moisture status and a nitrification inhibitor, dicyandiamide, on ammonia oxidizer and denitrifier growth and nitrous oxide emissions in a grassland soil. *Soil Biol. Biochem.* **2014**, *73*, 59-68. <https://doi.org/10.1016/j.soilbio.2014.02.011>
3. Wang, Q.; Hu, H.W.; Shen, J.P.; Du, S.; Zhang, L.M.; He, J.Z.; Han, L.L. Effects of the nitrification inhibitor dicyandiamide (DCD) on N<sub>2</sub>O emissions and the abundance of nitrifiers and denitrifiers in two contrasting agricultural soils. *J. Soil. Sediment.* **2016**, *17*, 1635-1643. <https://doi.org/10.1007/s11368-016-1633-9>
